# Supplementary material for: N1-Methylpseudouridine Directly Modulates Translation Dynamics
Source: Research Square preprint supplement (doi:10.21203/rs.3.rs-5873147/v1), 2025-10-24
Supplement: Supplementary file 1 [file 6ad2bb8c30240b1a33986601.xlsx]

## Sheet: Table 1
	Uridine-PRE	m1Y-PRE
	(EMD-55091, PDB-9SPI)	(EMD-55083, PDB-9SPF)
Data collection and processing
Microscope	Titan Krios	Titan Krios
Camera	Gatan K3	Gatan K3
Voltage (kV)	300	300
Magnification	105000	105000
Pixel size (Å)	0.8245	0.8245
Defocus range (μM)	(-0.6) - (-1.7)	(-0.6) - (-1.7)
Total electron exposure (e/Å2)	41.42	43.07
Micrographs collected	35660	29926
Symmetry imposed	C1	C1
Number of particles (autopicked)	1895998	3076448
Number of particles (used for 3D reconstruction)	94974	121901
Map resolution (Å)	2.4	2.4
FSC threshold	0.143	0.143
CC (model to map fit)	0.84	0.91
Refinement
Initial model used (PDB code)	8GLP	8GLP
Map sharpening B factor (Å2)	-25	-20
Model composition
Non-hydrogen atoms	216692	211465
Protein residues	11071	11325
Nucleotides	5447	5566
Ligands
PUT	8	9
ZN	7	7
HYG	1	1
K	75	151
SPD	18	19
MG	195	225
NA	-	35
R.M.S. deviations
Bond lengths (Å)	0.004	0.009
Bond angles (°)	0.795	1.049
Chirality (˚)	0.052	0.114
Planarity (˚)	0.005	0.011
Validation
Clashscore	6.75	4.99
MolProbity score	1.72	1.67
Rotamer outliers (%)	2.45	2.41
Ramachandran plot
Favored (%)	97.76	97.4
Allowed (%)	2.18	2.56
Disallowed (%)	0.06	0.04
RNA
Correct sugar pucker (%)	99.69	99.48
Correct backbone conformation (%)	88.57	84.95
